# Supplementary material
Source: MDPI journal article supplement (https://www.mdpi.com/2071-1050/13/9/5234)
Supplement: s1 [file s1]

Table S1: Complete Commitment Indicators and Their Degrees Deduced From The Literature

| Design Phase Commitment Indicators and Degrees for Waste Reduction              |                                                                             |                                                       |                                                                             |                                                         |
|---------------------------------------------------------------------------------|-----------------------------------------------------------------------------|-------------------------------------------------------|-----------------------------------------------------------------------------|---------------------------------------------------------|
|                                                                                 | Extent of commitment                                                        |                                                       |                                                                             |                                                         |
| Commitments' Indicators for Waste Reduction                                     | 1: Low Commitment                                                           | 2: Medium Commitment                                  | 3: High Commitment                                                          | 4: Excellent Commitment                                 |
| Availability of resources                                                       | Identify resource demand from project design                                | Specify designed resource capacity                    | Specify the resources gap                                                   | Close resources gap                                     |
| The usage level of reuse and recycle construction and demolition materials      | Identify the available reuse and recycled materials available in the market | Involve contractors and suppliers in materials design | Integrate the selected recycle and reuse materials in the project design    | Conduct materials' life- cycle assessment               |
| The usage level of BIM computer modeling in the project to reduce waste.        | Identify the design elements                                                | Collect necessary information                         | Integrate and analyze construction materials' elements in the design        | Using BIM-based material analysis tools                 |
| Incorporate design flexibility factors                                          | Identify the design elements                                                | Define the effectiveness of the architectural spaces  | Allow for adaptation of the space                                           | Conduct risk analysis                                   |
| Involve green expertise in terms of waste management                            | Identify professionals with expertise in green design                       | Pre-qualify applicants                                | Select the most suitable professionals with experiences in waste management | Integrate green experts' design ideas                   |
| Design Phase Commitment Indicators and Degrees for Energy Consumption Reduction |                                                                             |                                                       |                                                                             |                                                         |
|                                                                                 | Extent of commitment                                                        |                                                       |                                                                             |                                                         |
| Commitments' Indicators for Energy Consumption Reduction                        | 1: Low Commitment                                                           | 2: Medium Commitment                                  | 3: High Commitment                                                          | 4: Excellent Commitment                                 |
| Incorporation level of renewable energy sources into the project.               | Identify the renewable energy technologies available in the market          | Select suitable renewable technologies                | Integrate the selected renewable technologies with project design           | Use dynamic simulation to check project systems synergy |
| Involve green expertise in terms of energy reduction                            | Identify professionals with expertise in green design practices             | Pre-qualify applicants                                | Select the most suitable professionals with experiences in energy reduction | Integrate green experts' design ideas                   |

|                                                                                             |                                                                                                                                       |                                                                        |                                                                                      |                                                                                       |
|---------------------------------------------------------------------------------------------|---------------------------------------------------------------------------------------------------------------------------------------|------------------------------------------------------------------------|--------------------------------------------------------------------------------------|---------------------------------------------------------------------------------------|
| The usage level of BIM computer modeling in the project to reduce energy consumption        | Identify the design elements                                                                                                          | Collect necessary information                                          | Integrate and analyze renewable energy technologies in the design                    | Using BIM analysis tools to optimize energy design                                    |
| The consideration level of operating and maintenance factors during the design              | Identify equipment accessibility, standardization, modularization, ease of maintenance for the selected energy equipment and machines | Seek inputs from maintenance personnel                                 | Integrate energy equipment maintenance and operation considerations in the design    | Simulate annual loads and peak demands                                                |
| Design For net-zero energy                                                                  | Identify innovative technologies and renewable power generation available in the market                                               | Deciding on the most fitting energy-efficient equipment and techniques | Achieving design energy efficiency through reducing the demand for energy            | Conduct an asset assessment to identify energy-saving                                 |
| Design Phase Commitment Indicators and Degrees for Carbon Emission Reduction                |                                                                                                                                       |                                                                        |                                                                                      |                                                                                       |
|                                                                                             | Extent of commitment                                                                                                                  |                                                                        |                                                                                      |                                                                                       |
| Commitments' Indicators for Carbon Emission Reduction                                       | 1: Low Commitment                                                                                                                     | 2: Medium Commitment                                                   | 3: High Commitment                                                                   | 4: Excellent Commitment                                                               |
| Involve green expertise in terms of carbon emission reduction                               | Identify professionals with expertise in green design practices                                                                       | Pre-qualify applicants                                                 | Select the most suitable professionals with experiences in carbon emission reduction | Integrate green experts' design ideas into project design                             |
| The usage level of BIM computer modeling in the project to reduce carbon emissions          | Identify the design elements                                                                                                          | Collect necessary information                                          | Integrate and analyze renewable energy technologies to identify carbon emission      | Using BIM analysis tools to optimize design of mechanical systems and reduce emission |
| Incorporation level of renewable energy sources into the project to reduce carbon emissions | Identify the renewable energy technologies available in the market and their carbon emission level                                    | Select suitable renewable technologies                                 | Integrate the selected renewable technologies with project design                    | Use dynamic simulation to check project total carbon emission                         |

|                                                                                                            |                                                                                                                                               |                                                                                      |                                                                                |                                                                                 |
|------------------------------------------------------------------------------------------------------------|-----------------------------------------------------------------------------------------------------------------------------------------------|--------------------------------------------------------------------------------------|--------------------------------------------------------------------------------|---------------------------------------------------------------------------------|
| Minimizing designs carbon footprint for the project (Net Zero Carbon)                                      | Identify the total carbon footprint for the project design                                                                                    | Specify carbon reduction opportunities                                               | Select alternative layouts, materials, and equipment to reduce carbon emission | Conduct life-cycle assessment based on the carbon footprint                     |
| The consideration level of operating and maintenance factors during the design to minimize carbon emission | Identify equipment accessibility, standardization, modularization, ease of maintenance for the equipment and machines selected in the project | Seek inputs from maintenance personnel                                               | Integrate equipment maintenance and operation considerations in the design     | Simulate annual loads and peak demands to determine the carbon emission profile |
| Construction Phase Commitment Indicators and Degrees for Waste Reduction                                   |                                                                                                                                               |                                                                                      |                                                                                |                                                                                 |
|                                                                                                            | Extent of commitment                                                                                                                          |                                                                                      |                                                                                |                                                                                 |
| Commitments' Indicators for Waste Reduction                                                                | 1: Low Commitment                                                                                                                             | 2: Medium Commitment                                                                 | 3: High Commitment                                                             | 4: Excellent Commitment                                                         |
| Materials ordering and delivery                                                                            | Check issued for construction (IFC) drawings                                                                                                  | Check material specifications                                                        | Ordering materials                                                             | Specify expected materials delivery times                                       |
| Materials storage and installation                                                                         | Store materials and classify them                                                                                                             | Identify the quantity of work and labor productivity to specify materials efficiency | Handling the exact amount of materials                                         | Correctly install raw materials to reduce wastage                               |
| Waste auditing                                                                                             | Identify the amount of the waste materials produced during construction                                                                       | Coordinate with the construction team members to dispose of waste materials          | Segregate waste materials                                                      | Reuse the recycle and reuse materials on-site                                   |
| The minimization level of rework in the construction phase                                                 | Communicate intensively with designers and client                                                                                             | Identify several potential rework items and categorize them                          | Prepare a contingency plan                                                     | Track responsibility for each rework occurrence                                 |
| On-site waste management facility                                                                          | Identify project site layout                                                                                                                  | Select the best location to set waste management facility                            | Assign personnel to manage the facility                                        | Hire a waste contractor to deal with construction wastes                        |

| Construction Phase Commitment Indicators and Degrees for Energy Consumption Reduction |                                                                                                   |                                                                                                |                                                                  |                                                                            |
|---------------------------------------------------------------------------------------|---------------------------------------------------------------------------------------------------|------------------------------------------------------------------------------------------------|------------------------------------------------------------------|----------------------------------------------------------------------------|
|                                                                                       | Extent of commitment                                                                              |                                                                                                |                                                                  |                                                                            |
| Commitments' Indicators for Energy Consumption Reduction                              | 1: Low Commitment                                                                                 | 2: Medium Commitment                                                                           | 3: High Commitment                                               | 4: Excellent Commitment                                                    |
| Access level of the contractor to necessary information                               | Establish an effective communication method                                                       | Exchange essential information and data                                                        | Get from consultant complete data set                            | Predict the energy required based on data collected from consultant        |
| Energy consumption during construction operation                                      | Identify the total energy required to complete construction operations                            | Identify tools or equipment used to complete construction operations                           | Specify types of energy used                                     | Reduce energy consumption                                                  |
| The embodied energy level of the project building materials                           | Identify construction material used in the project                                                | Specify the embodied energy for each construction materials                                    | Classify project construction materials based on embodied energy | Select possible alternatives for high embodied energy material             |
| Reduce materials' transportation distance to reduce energy consumption                | Identify selected suppliers and materials manufacturing locations                                 | Identify possible routes between suppliers and manufacturing locations to the project site     | Select the shortest route                                        | Prepare a contingency route                                                |
| Labor efficiency during construction activities                                       | Identify different activities of workers during the project                                       | Specify workers' production level                                                              | Classify construction works according to energy needed           | Assign the most skilled workers to the activities that require high energy |
| Construction Phase Commitment Indicators and Degrees for Carbon Emission Reduction    |                                                                                                   |                                                                                                |                                                                  |                                                                            |
|                                                                                       | Extent of commitment                                                                              |                                                                                                |                                                                  |                                                                            |
| Commitments' Indicators for Carbon Emission Reduction                                 | 1: Low Commitment                                                                                 | 2: Medium Commitment                                                                           | 3: High Commitment                                               | 4: Excellent Commitment                                                    |
| Carbon energy                                                                         | Identify total energy required to complete construction operations                                | Identify tools or equipment used to complete construction operations                           | Specify types of energy used to run project tools and equipment  | Reduce energy consumption                                                  |
| Reduce materials transportation                                                       | Identify selected suppliers and materials manufacture location and its distance from project site | Identify possible routes between suppliers and materials manufacture location and project site | Select the shortest route to ensure minimum carbon emission      | Prepare a contingency route                                                |

|                                                                                                       |                                                                              |                                                                                           |                                                                                                             |                                                                                                                    |
|-------------------------------------------------------------------------------------------------------|------------------------------------------------------------------------------|-------------------------------------------------------------------------------------------|-------------------------------------------------------------------------------------------------------------|--------------------------------------------------------------------------------------------------------------------|
| Reduce carbon emission (embodied carbon)                                                              | Identify construction material used in the project                           | Specify the embodied energy for each construction materials and its carbon emission level | Classify project construction materials from high, medium, and low carbon emission based on embodied energy | Select possible alternative for high embodied energy material (high carbon emission)                               |
| Carbon emission from construction waste                                                               | Identify the amount of the materials waste produced during construction      | Identify direct carbon-based and indirectly carbon-based                                  | Classify the direct and indirect carbon-based emissions                                                     | Perform waste auditing on the high direct and indirect carbon emission                                             |
| Labor efficiency during construction activities                                                       | Identify different activities of workers during the project                  | Specify workers production level                                                          | Classify construction works according to energy needed and carbon emission                                  | Assign the most skilled workers to the activities that require high energy and, by extension, high carbon emission |
| Closeout and Commissioning Phase Commitment Indicators and Degrees for Waste Reduction                |                                                                              |                                                                                           |                                                                                                             |                                                                                                                    |
|                                                                                                       | Extent of commitment                                                         |                                                                                           |                                                                                                             |                                                                                                                    |
| Commitments' Indicators for Waste Reduction                                                           | 1: Low Commitment                                                            | 2: Medium Commitment                                                                      | 3: High Commitment                                                                                          | 4: Excellent Commitment                                                                                            |
| Incorporate commissioning team with design and construction project team to reduce construction waste | Identify members of the project team with experience in waste management     | Select members                                                                            | Specify and document best practices and strategies                                                          | Incorporate commissioning team practices and strategies into project design and construction                       |
| Check total construction waste                                                                        | Identify the amount of all project materials waste at the end of the project | Recorded waste according to the source activity                                           | Segregate waste                                                                                             | Calculate total tons (or bulk m <sup>3</sup> ) of waste sent to landfill                                           |
| Identify and document lessons learned for waste management                                            | Identify best practices implemented in the project for waste management      | Classify best practices                                                                   | Document best waste management practices in the project                                                     | Retain the lessons-learned reports on a shared drive                                                               |
| Waste management checklist for project activities                                                     | Identify project systems used to reduce project waste                        | Specify a list of actions that must be performed                                          | Check the fulfillment of project systems                                                                    | Identify which system has low performance in waste management checklist                                            |

|                                                                                                       |                                                                                   |                                                                                       |                                                                                    |                                                                                               |
|-------------------------------------------------------------------------------------------------------|-----------------------------------------------------------------------------------|---------------------------------------------------------------------------------------|------------------------------------------------------------------------------------|-----------------------------------------------------------------------------------------------|
| Salvaging reuse and recycling construction waste                                                      | Identify the amount of all project materials waste at the end of the project      | Segregate waste                                                                       | Specify quality and condition of materials and components                          | Contract with special contractor to handle's with reuse and recycle construction materials    |
| Closeout and Commissioning Phase Commitment Indicators and Degrees for Energy Consumption Reduction   |                                                                                   |                                                                                       |                                                                                    |                                                                                               |
|                                                                                                       | Extent of commitment                                                              |                                                                                       |                                                                                    |                                                                                               |
| Commitments' Indicators for Energy Consumption Reduction                                              | 1: Low Commitment                                                                 | 2: Medium Commitment                                                                  | 3: High Commitment                                                                 | 4: Excellent Commitment                                                                       |
| Incorporate commissioning team with design and construction project team to reduce energy consumption | Identify members of the project team with experience in energy reduction          | Select members to be involved in the commissioning team                               | Specify and document best practices and strategies in terms of energy conservation | Incorporate commissioning team practices and strategies into project design and construction  |
| Identify and document lessons learned for energy consumption                                          | Identify best practices implemented in the project for energy conservation        | Classify best practices according to project phases                                   | Document best energy conservation practices in the project                         | Retain the lessons-learned reports on a shared drive                                          |
| Energy conservation checklist for project systems                                                     | Identify project activities and systems used to reduce project energy consumption | Specify a list of actions that must be performed to reduce project energy consumption | Check the fulfillment of project systems                                           | Identify which activity and systems that has low performance in energy conservation checklist |
| Check total of project energy consumption                                                             | Identify total amount of energy consumption from all project systems and machines | Specify energy consumption of project systems from the nonrenewable energy source     | Specify renewable energy produced from the project                                 | Calculate the net energy of the building                                                      |
| Check electrical systems synergy                                                                      | Identify project systems that are integrated with each other                      | Specify the tolerance energy load for the building systems                            | Measure the efficiency of system recovery during power failure through simulation  | Evaluate and test energy function and operation                                               |

| Closeout and Commissioning Phase Commitment Indicators and Degrees for Carbon Emission Reduction       |                                                                                   |                                                                                                                |                                                                                                                                     |                                                                                                                                  |
|--------------------------------------------------------------------------------------------------------|-----------------------------------------------------------------------------------|----------------------------------------------------------------------------------------------------------------|-------------------------------------------------------------------------------------------------------------------------------------|----------------------------------------------------------------------------------------------------------------------------------|
|                                                                                                        | Extent of commitment                                                              |                                                                                                                |                                                                                                                                     |                                                                                                                                  |
| Commitments' Indicators for Carbon Emission Reduction                                                  | 1: Low Commitment                                                                 | 2: Medium Commitment                                                                                           | 3: High Commitment                                                                                                                  | 4: Excellent Commitment                                                                                                          |
| Incorporate the commissioning team with design and construction project team to reduce carbon emission | Identify members of the project team with experience in carbon emission reduction | Select members to be involved in the commissioning team                                                        | Specify and document best practices and strategies in terms of carbon emission reduction included in design and construction stages | Incorporate commissioning team practices and strategies into project design and construction to ensure carbon emission reduction |
| Identify and document lessons learned for carbon emission reduction                                    | Identify best practices implemented in the project for carbon emission reduction  | Classify best practices according to project phases                                                            | Document best carbon emission reduction practices in the project                                                                    | Retain the lessons-learned reports on a shared drive                                                                             |
| Carbon emission checklist for project systems.                                                         | Identify project activities and systems used to reduce project carbon emission    | Specify a list of actions that must be performed in each activity and system to reduce project carbon emission | Check the fulfillment of project activities and systems                                                                             | Identify which activity and systems has low performance in carbon emission checklist                                             |
| Calculating the total carbon footprint of the project.                                                 | Identify sources of carbon emission at project completion                         | Specify direct carbon emissions                                                                                | Estimate the carbon emission saved through using different renewable project equipment and machines                                 | Calculate the net carbon emission of the building                                                                                |
| Carbon offset                                                                                          | Identify project carbon emission that cannot not be reduced                       | Specify project's offset strategy                                                                              | Identify and select a reputable offset provider based on the budget                                                                 | Implement the carbon offset strategy                                                                                             |

Table S2: Expert Panel Responses

|                                        |                                                                                                                                                        |                  |                  |                  |                  |                  |              |      |              |                     |
|----------------------------------------|--------------------------------------------------------------------------------------------------------------------------------------------------------|------------------|------------------|------------------|------------------|------------------|--------------|------|--------------|---------------------|
| Commitments Indicators in Design Phase |                                                                                                                                                        |                  |                  |                  |                  |                  |              |      |              |                     |
|                                        | Fulfill Waste Reduction                                                                                                                                | Frequency of "5" | Frequency of "4" | Frequency of "3" | Frequency of "2" | Frequency of "1" | Average Rate | Rank | Overall Rank | Indicator or Weight |
|                                        | Availability of resources.                                                                                                                             | 2                | 3                | 3                | 0                | 0                | 3.875        | 5    | 42           | 0.00509             |
|                                        | The usage level of reuse and recycle construction and demolition materials in the project design                                                       | 4                | 3                | 1                | 0                | 0                | 4.375        | 1    | 8            | 0.02671             |
|                                        | The usage level of BIM computer modeling in the project design to reduce waste.                                                                        | 3                | 2                | 3                | 0                | 0                | 4            | 4    | 35           | 0.00611             |
|                                        | Incorporate design flexibility and durability (buildings that are designed with the flexibility to adapt to changing functions over long useful lives) | 4                | 3                | 0                | 0                | 1                | 4.125        | 3    | 25           | 0.00855             |
|                                        | Involving green experts with waste management experience in the design team                                                                            | 3                | 4                | 1                | 0                | 0                | 4.25         | 2    | 18           | 0.01187             |
|                                        |                                                                                                                                                        |                  |                  |                  |                  |                  |              |      |              |                     |
|                                        | Fulfill Energy Consumption Reduction                                                                                                                   | Frequency of "5" | Frequency of "4" | Frequency of "3" | Frequency of "2" | Frequency of "1" | Average Rate | Rank | Overall Rank | Indicator or Weight |
|                                        | Incorporation level of renewable energy sources into the project design                                                                                | 4                | 4                | 0                | 0                | 0                | 4.5          | 1    | 4            | 0.05342             |
|                                        | Involving green experts with energy reduction experience in the design team                                                                            | 4                | 4                | 0                | 0                | 0                | 4.5          | 2    | 5            | 0.04274             |
|                                        | The usage level of BIM computer modeling in the project design to reduce energy consumption.                                                           | 2                | 4                | 2                | 0                | 0                | 4            | 5    | 36           | 0.00594             |
|                                        | The consideration level of operating and maintenance factors during the design.                                                                        | 4                | 3                | 0                | 0                | 1                | 4.125        | 4    | 26           | 0.00822             |
|                                        | Design for net-zero energy                                                                                                                             | 3                | 4                | 1                | 0                | 0                | 4.25         | 3    | 19           | 0.01125             |
| Commitments                            |                                                                                                                                                        |                  |                  |                  |                  |                  |              |      |              |                     |
|                                        | Fulfill Carbon Emissions Reduction                                                                                                                     | Frequency of "5" | Frequency of "4" | Frequency of "3" | Frequency of "2" | Frequency of "1" | Average Rate | Rank | Overall Rank | Indicator or Weight |
|                                        | Involving green experts with carbon emission reduction experience in the design team                                                                   | 3                | 5                | 0                | 0                | 0                | 4.375        | 1    | 9            | 0.02374             |



|                                                              |                                                                                                                          |                  |                  |                  |                  |                  |              |      |              |                  |
|--------------------------------------------------------------|--------------------------------------------------------------------------------------------------------------------------|------------------|------------------|------------------|------------------|------------------|--------------|------|--------------|------------------|
|                                                              | The usage level of BIM computer modeling in the project design to reduce carbon emissions.                               | 1                | 3                | 4                | 0                | 0                | 3.625        | 5    | 52           | 0.00411          |
|                                                              | Incorporation level of renewable energy sources into the project to reduce carbon emissions.                             | 2                | 5                | 1                | 0                | 0                | 4.125        | 4    | 27           | 0.00791          |
|                                                              | Minimizing designs carbon footprint for the project (Net Zero Carbon)                                                    | 4                | 3                | 1                | 0                | 0                | 4.375        | 2    | 10           | 0.02137          |
|                                                              | The consideration level of operating and maintenance factors during the design to minimize carbon emission.              | 5                | 2                | 0                | 0                | 1                | 4.25         | 3    | 20           | 0.01068          |
|                                                              |                                                                                                                          |                  |                  |                  |                  |                  |              |      |              |                  |
| Commitments Indicators in Construction Phase                 | Fulfill Waste Reduction                                                                                                  | Frequency of "5" | Frequency of "4" | Frequency of "3" | Frequency of "2" | Frequency of "1" | Average Rate | Rank | Overall Rank | Indicator Weight |
|                                                              | Organizing materials ordering and delivery                                                                               | 3                | 2                | 3                | 0                | 0                | 4            | 3    | 37           | 0.00578          |
|                                                              | Organizing Materials storage and installation                                                                            | 3                | 1                | 4                | 0                | 0                | 3.875        | 5    | 43           | 0.00497          |
|                                                              | Conducting waste auditing                                                                                                | 2                | 5                | 0                | 1                | 0                | 4            | 4    | 38           | 0.00562          |
|                                                              | The minimization level of rework in the construction phase.                                                              | 4                | 2                | 2                | 0                | 0                | 4.25         | 2    | 21           | 0.01018          |
|                                                              | Developing on-site waste management facility                                                                             | 5                | 1                | 2                | 0                | 0                | 4.375        | 1    | 11           | 0.01943          |
|                                                              |                                                                                                                          |                  |                  |                  |                  |                  |              |      |              |                  |
|                                                              | Fulfill Energy Consumption Reduction                                                                                     | Frequency of "5" | Frequency of "4" | Frequency of "3" | Frequency of "2" | Frequency of "1" | Average Rate | Rank | Overall Rank | Indicator Weight |
|                                                              | Access level of the contractor to necessary information regarding energy consumption from pre-construction planning data | 0                | 5                | 2                | 1                | 0                | 3.5          | 2    | 54           | 0.00396          |
|                                                              | Identifying energy consumption during construction operation.                                                            | 1                | 5                | 2                | 0                | 0                | 3.875        | 1    | 44           | 0.00486          |
| The embodied energy level of the project building materials. | 0                                                                                                                        | 5                | 1                | 1                | 1                | 3.25             | 5            | 58   | 0.00368      |                  |
| Commitments Indicators in                                    | Reduce materials transportation distance to reduce energy consumption.                                                   | 1                | 3                | 3                | 0                | 1                | 3.375        | 4    | 57           | 0.00375          |
|                                                              | Specify labor efficiency during construction activities to reduce energy consumption                                     | 1                | 3                | 3                | 1                | 0                | 3.5          | 3    | 55           | 0.00389          |
|                                                              |                                                                                                                          |                  |                  |                  |                  |                  |              |      |              |                  |

|                                                        |                                                                                                               |                  |                  |                  |                  |                  |              |      |              |                  |
|--------------------------------------------------------|---------------------------------------------------------------------------------------------------------------|------------------|------------------|------------------|------------------|------------------|--------------|------|--------------|------------------|
|                                                        | Fulfill Carbon Emissions Reduction                                                                            | Frequency of "5" | Frequency of "4" | Frequency of "3" | Frequency of "2" | Frequency of "1" | Average Rate | Rank | Overall Rank | Indicator Weight |
|                                                        | Reduce Energy consumption during construction operation to minimize carbon emission                           | 3                | 4                | 1                | 0                | 0                | 4.25         | 1    | 22           | 0.00971          |
|                                                        | Reduce materials transportation distance to reduce carbon emission                                            | 1                | 2                | 2                | 1                | 2                | 2.875        | 4    | 59           | 0.00362          |
|                                                        | Reduce carbon emission (embodied carbon) through minimizing embodied energy of the project building materials | 1                | 5                | 1                | 1                | 0                | 3.75         | 3    | 50           | 0.00427          |
|                                                        | Minimize carbon emission from construction waste                                                              | 3                | 4                | 1                | 0                | 0                | 4.25         | 2    | 23           | 0.00929          |
|                                                        | Specify labor efficiency during construction activities to reduce carbon emission                             | 0                | 3                | 3                | 0                | 2                | 2.875        | 5    | 60           | 0.00356          |
|                                                        |                                                                                                               |                  |                  |                  |                  |                  |              |      |              |                  |
| Commitments Indicators in Closeout/Commissioning Phase | Fulfill Waste Reduction                                                                                       | Frequency of "5" | Frequency of "4" | Frequency of "3" | Frequency of "2" | Frequency of "1" | Average Rate | Rank | Overall Rank | Indicator Weight |
|                                                        | Incorporate commissioning team with design and construction project team to reduce construction waste.        | 2                | 2                | 4                | 0                | 0                | 3.75         | 4    | 51           | 0.00419          |
|                                                        | Specify the total amount of project waste produced at the project end                                         | 1                | 4                | 2                | 0                | 1                | 3.5          | 5    | 56           | 0.00382          |
|                                                        | Identify and document lessons learned for waste management practices applied in the project                   | 2                | 5                | 1                | 0                | 0                | 4.125        | 2    | 28           | 0.00763          |
|                                                        | Check the waste management checklist for project activities                                                   | 3                | 2                | 3                | 0                | 0                | 4            | 3    | 39           | 0.00548          |
|                                                        | Salvaging reuse and recycling construction waste                                                              | 4                | 4                | 0                | 0                | 0                | 4.5          | 1    | 6            | 0.03561          |
|                                                        |                                                                                                               |                  |                  |                  |                  |                  |              |      |              |                  |
|                                                        | Fulfill Energy Consumption Reduction                                                                          | Frequency of "5" | Frequency of "4" | Frequency of "3" | Frequency of "2" | Frequency of "1" | Average Rate | Rank | Overall Rank | Indicator Weight |
|                                                        | Incorporate commissioning team with design and construction project team to reduce energy consumption.        | 3                | 3                | 2                | 0                | 0                | 4.125        | 2    | 29           | 0.00737          |

|                                                                                                         |                  |                  |                  |                  |                  |              |      |              |                     |
|---------------------------------------------------------------------------------------------------------|------------------|------------------|------------------|------------------|------------------|--------------|------|--------------|---------------------|
| Identify and document lessons learned for energy consumption reduction practices applied in the project | 3                | 5                | 0                | 0                | 0                | 4.375        | 1    | 12           | 0.01781             |
| Check energy conservation checklist for project systems.                                                | 2                | 4                | 2                | 0                | 0                | 4            | 4    | 40           | 0.00534             |
| Check total of project energy consumption.                                                              | 2                | 4                | 1                | 1                | 0                | 3.875        | 5    | 45           | 0.00475             |
| Check electrical systems synergy to ensure energy consumption reduction                                 | 1                | 7                | 0                | 0                | 0                | 4.125        | 3    | 30           | 0.00712             |
|                                                                                                         |                  |                  |                  |                  |                  |              |      |              |                     |
| Fulfill Carbon Emissions Reduction                                                                      | Frequency of "5" | Frequency of "4" | Frequency of "3" | Frequency of "2" | Frequency of "1" | Average Rate | Rank | Overall Rank | Indicator or Weight |
| Incorporate commissioning team with design and construction project team to reduce carbon emission.     | 2                | 4                | 2                | 0                | 0                | 4            | 4    | 41           | 0.00521             |
| Identify and document lessons learned for carbon emission reduction practices applied in the project    | 3                | 5                | 0                | 0                | 0                | 4.375        | 1    | 13           | 0.01644             |
| Check carbon emission checklist for project systems                                                     | 2                | 3                | 3                | 0                | 0                | 3.875        | 5    | 46           | 0.00465             |
| Estimating the total carbon footprint of the project                                                    | 4                | 2                | 1                | 1                | 0                | 4.125        | 3    | 31           | 0.00689             |
| Develop carbon offset strategy                                                                          | 3                | 5                | 0                | 0                | 0                | 4.375        | 2    | 14           | 0.01526             |

Table S3: Case Study Tool Inputs of Project Participant in Definition and Planning Phase

| Are you Committed to the following Decision |     | If Select No Justify Your Selection | Commitment Indicator For Carbon Emissions Reduction                                                                                                                                         | Perform a screening to estimate the magnitude of carbon emissions                    | Specify potential for emissions reductions | Design strategies and processes to control the emissions                | Implement and document selected strategies and processes              | Commitment Outcome for Carbon Emissions Reduction |
|---------------------------------------------|-----|-------------------------------------|---------------------------------------------------------------------------------------------------------------------------------------------------------------------------------------------|--------------------------------------------------------------------------------------|--------------------------------------------|-------------------------------------------------------------------------|-----------------------------------------------------------------------|---------------------------------------------------|
| Carbon Emissions Reduction                  | Yes |                                     | Assessing the carbon emissions control level of the project                                                                                                                                 | YesY                                                                                 | Y                                          | Y                                                                       | N                                                                     | Medium Carbon Emission Reduction Commitment 50%   |
|                                             |     |                                     | Supplier choice in terms of carbon emission reduction                                                                                                                                       | NA                                                                                   |                                            |                                                                         |                                                                       |                                                   |
|                                             |     |                                     |                                                                                                                                                                                             | Identify the most influential actors (different authorities and NGO representatives) | Select carbon emission actors              | Develop policies and strategies for promoting carbon emission reduction | Implement and document carbon emission actors policies and strategies |                                                   |
|                                             |     |                                     | The involvement of sustainability-promoting actors in carbon emission reduction planning                                                                                                    | YesY                                                                                 | Y                                          | Y                                                                       | Y                                                                     |                                                   |
|                                             |     |                                     | The availability of sustainable Incentive/penalty clauses in the contract to pursue carbon emission reduction                                                                               | NA                                                                                   |                                            |                                                                         |                                                                       |                                                   |
|                                             |     |                                     |                                                                                                                                                                                             |                                                                                      |                                            |                                                                         |                                                                       |                                                   |
|                                             |     |                                     | Capacity study of carbon emission (provide a description of the related process flows and interactions allowing the planning team to ensure adequate facility capacity for carbon emission) | NA                                                                                   |                                            |                                                                         |                                                                       |                                                   |

| At The End of The Definition/Planning Phase                         |     |                                                          |                                                                           |     |                                                                                      |                                                                                                                                                  |                                                          |                                                                       |                                                   |
|---------------------------------------------------------------------|-----|----------------------------------------------------------|---------------------------------------------------------------------------|-----|--------------------------------------------------------------------------------------|--------------------------------------------------------------------------------------------------------------------------------------------------|----------------------------------------------------------|-----------------------------------------------------------------------|---------------------------------------------------|
| Participant 1                                                       |     | PM-Owner                                                 |                                                                           |     |                                                                                      |                                                                                                                                                  |                                                          |                                                                       |                                                   |
|                                                                     |     | Did Your Commitment level Same as Beginning of The Phase |                                                                           |     |                                                                                      |                                                                                                                                                  |                                                          |                                                                       |                                                   |
| What is Your Commitment at The End of The Definition/Planning Phase |     | Waste Reduction                                          |                                                                           | Yes |                                                                                      | If Yes Do not Complete Waste Reduction Table Otherwise Complete the Waste Reduction Tables According to What Has Been Done                       |                                                          |                                                                       |                                                   |
|                                                                     |     | Carbon Emissions Reduction                               |                                                                           | No  |                                                                                      | If Yes Do not Complete Carbon Emissions Reduction Table Otherwise Complete the Carbon Emissions Reduction Tables According to What Has Been Done |                                                          |                                                                       |                                                   |
| Are you Committed to the following Decision                         |     | If Select No Justify Your Selection                      | Commitment Indicator For Carbon Emissions Reduction                       |     | Perform a screening to estimate the magnitude of carbon emissions                    | Specify potential for emissions reductions                                                                                                       | Design strategies and processes to control the emissions | Implement and document selected strategies and processes              | Commitment Outcome for Carbon Emissions Reduction |
| Carbon Emissions Reduction                                          | Yes |                                                          | Assessing the carbon emissions control level of the project               | Yes | Y                                                                                    | N                                                                                                                                                | N                                                        | N                                                                     | High Carbon Emission Reduction Commitment 75%     |
|                                                                     |     |                                                          |                                                                           |     | Identify suppliers available in the market                                           | Prequalify suppliers                                                                                                                             | Award supplier (s)                                       | Involving the chosen supplier in the project at early stages          |                                                   |
|                                                                     |     |                                                          | Supplier choice in terms of carbon emission reduction                     | Yes | Y                                                                                    | Y                                                                                                                                                | Y                                                        | Y                                                                     |                                                   |
|                                                                     |     |                                                          |                                                                           |     | Identify the most influential actors (different authorities and NGO representatives) | Select carbon emission actors                                                                                                                    | Develop policies and strategies                          | Implement and document carbon emission actors policies and strategies |                                                   |
|                                                                     |     |                                                          | The involvement of sustainability-promoting actors                        | Yes | Y                                                                                    | Y                                                                                                                                                | Y                                                        | N                                                                     |                                                   |
|                                                                     |     |                                                          | The availability of sustainable Incentive/penalty clauses in the contract | NA  |                                                                                      |                                                                                                                                                  |                                                          |                                                                       |                                                   |
|                                                                     |     |                                                          |                                                                           |     | Identify and map key opportunity areas                                               | Specify major mechanical and equipments design requirements                                                                                      | Develop a carbon emission capacity reduction plan        | Implement the developed emission capacity plan                        |                                                   |
|                                                                     |     |                                                          | Capacity study of carbon emission                                         | Yes | Y                                                                                    | Y                                                                                                                                                | Y                                                        | Y                                                                     |                                                   |

|                                                                           |               |                                                                                                            |                                             |                                            |                                                       |                                            |                                              |                                      |                                        |
|---------------------------------------------------------------------------|---------------|------------------------------------------------------------------------------------------------------------|---------------------------------------------|--------------------------------------------|-------------------------------------------------------|--------------------------------------------|----------------------------------------------|--------------------------------------|----------------------------------------|
| Participant 2                                                             | PM-Consultant | At The Beginning of The Definition/Planning Phase                                                          |                                             |                                            |                                                       |                                            |                                              |                                      |                                        |
| What is Your Commitment at The Beginning of The Definition/Planning Phase |               |                                                                                                            |                                             | First Parameter (25% of Commitment Degree) | Second Parameter (50% of Commitment Degree)           | Third Parameter (75% of Commitment Degree) | Fourth Parameter (100% of Commitment Degree) |                                      |                                        |
| Are you Committed to the following Decision                               |               | If Select No Justify Your Selection                                                                        | Is This Indicator Applicable to The Project | Conduct VM workshop                        | Brainstorming best practice ideas and group dynamics  | Formulating plans and strategies           | Implementation and feedback                  |                                      | Commitment Outcome for Waste Reduction |
|                                                                           | Yes           | The level of implementing Value Management (VM)                                                            | Yes                                         | Y                                          | Y                                                     | N                                          | N                                            | Excellent Waste Reduction Commitment |                                        |
| Waste Reduction                                                           |               | Material alternatives consideration                                                                        | NA                                          |                                            |                                                       |                                            |                                              |                                      |                                        |
|                                                                           |               |                                                                                                            |                                             | Select a recycling coordinator             | Conduct a waste audit to design the collection system | Select a collection contractor             | Implement the designed collection system     |                                      |                                        |
|                                                                           |               | Developing recycling plan                                                                                  | Yes                                         | Y                                          | Y                                                     | Y                                          | Y                                            |                                      |                                        |
|                                                                           |               |                                                                                                            |                                             |                                            |                                                       |                                            |                                              |                                      |                                        |
|                                                                           |               | Institutional arrangements for waste management                                                            | NA                                          |                                            |                                                       |                                            |                                              |                                      |                                        |
|                                                                           |               |                                                                                                            |                                             |                                            |                                                       |                                            |                                              |                                      |                                        |
|                                                                           |               | The availability level of sustainable incentive/penalty clauses in the contract to pursue waste management | NA                                          |                                            |                                                       |                                            |                                              |                                      |                                        |

| Are you Committed to the following Decision |  | If Select No Justify Your Selection | Commitment Indicator For Carbon Emissions Reduction                                                                                                                                         | Perform a screening to estimate the magnitude of carbon emissions | Specify potential for emissions reductions                        | Design strategies and processes to control the emissions             | Implement and document selected strategies and processes     | Commitment Outcome for Carbon Emissions Reduction |
|---------------------------------------------|--|-------------------------------------|---------------------------------------------------------------------------------------------------------------------------------------------------------------------------------------------|-------------------------------------------------------------------|-------------------------------------------------------------------|----------------------------------------------------------------------|--------------------------------------------------------------|---------------------------------------------------|
| Yes                                         |  |                                     | Assessing the carbon emissions control level of the project                                                                                                                                 | YesY                                                              | Y                                                                 | N                                                                    | N                                                            | Medium Carbon Emission Reduction Commitment 50%   |
| Carbon Emissions Reduction                  |  |                                     |                                                                                                                                                                                             | Identify suppliers available in the market                        | Prequalify suppliers                                              | Award supplier (s)                                                   | Involving the chosen supplier in the project at early stages |                                                   |
|                                             |  |                                     | Supplier choice in terms of carbon emission reduction                                                                                                                                       | YesY                                                              | Y                                                                 | Y                                                                    | N                                                            |                                                   |
|                                             |  |                                     |                                                                                                                                                                                             |                                                                   |                                                                   |                                                                      |                                                              |                                                   |
|                                             |  |                                     | The involvement of sustainability-promoting actors in carbon emission reduction planning                                                                                                    | NA                                                                |                                                                   |                                                                      |                                                              |                                                   |
|                                             |  |                                     |                                                                                                                                                                                             | Identify the contract parties                                     | Conduct a workshop to identify possible incentive/penalty clauses | Select the best combination of sustainable Incentive/penalty clauses | Agree and sign                                               |                                                   |
|                                             |  |                                     | The availability of sustainable Incentive/penalty clauses in the contract to pursue carbon emission reduction                                                                               | YesY                                                              | Y                                                                 | Y                                                                    | N                                                            |                                                   |
|                                             |  |                                     |                                                                                                                                                                                             |                                                                   |                                                                   |                                                                      |                                                              |                                                   |
|                                             |  |                                     | Capacity study of carbon emission (provide a description of the related process flows and interactions allowing the planning team to ensure adequate facility capacity for carbon emission) | NA                                                                |                                                                   |                                                                      |                                                              |                                                   |

| At The End of The Definition/Planning Phase                         |                                                          |                                                                                          |                                                                                                                                                  |                                                                                      |                               |                                                                         |                                                                       |  |                                                   |
|---------------------------------------------------------------------|----------------------------------------------------------|------------------------------------------------------------------------------------------|--------------------------------------------------------------------------------------------------------------------------------------------------|--------------------------------------------------------------------------------------|-------------------------------|-------------------------------------------------------------------------|-----------------------------------------------------------------------|--|---------------------------------------------------|
| Participant 2                                                       | PM-Consultant                                            |                                                                                          |                                                                                                                                                  |                                                                                      |                               |                                                                         |                                                                       |  |                                                   |
|                                                                     | Did Your Commitment level Same as Beginning of The Phase |                                                                                          |                                                                                                                                                  |                                                                                      |                               |                                                                         |                                                                       |  |                                                   |
| What is Your Commitment at The End of The Definition/Planning Phase | Waste Reduction                                          | Yes                                                                                      | If Yes Do not Complete Waste Reduction Table Otherwise Complete the Waste Reduction Tables According to What Has Been Done                       |                                                                                      |                               |                                                                         |                                                                       |  |                                                   |
|                                                                     | Carbon Emissions Reduction                               | No                                                                                       | If Yes Do not Complete Carbon Emissions Reduction Table Otherwise Complete the Carbon Emissions Reduction Tables According to What Has Been Done |                                                                                      |                               |                                                                         |                                                                       |  |                                                   |
| Are you Committed to the following Decision                         | If Select No Justify Your Selection                      | Commitment Indicator For Carbon Emissions Reduction                                      |                                                                                                                                                  |                                                                                      |                               |                                                                         |                                                                       |  | Commitment Outcome for Carbon Emissions Reduction |
| Carbon Emissions Reduction                                          | No                                                       | Assessing the carbon emissions control level of the project                              | NA                                                                                                                                               |                                                                                      |                               |                                                                         |                                                                       |  | Medium Carbon Emission Reduction Commitment 50%   |
|                                                                     |                                                          | Supplier choice in terms of carbon emission reduction                                    | NA                                                                                                                                               |                                                                                      |                               |                                                                         |                                                                       |  |                                                   |
|                                                                     |                                                          |                                                                                          |                                                                                                                                                  | Identify the most influential actors (different authorities and NGO representatives) | Select carbon emission actors | Develop policies and strategies for promoting carbon emission reduction | Implement and document carbon emission actors policies and strategies |  |                                                   |
|                                                                     |                                                          | The involvement of sustainability-promoting actors in carbon emission reduction planning | Yes                                                                                                                                              | Y                                                                                    | Y                             | Y                                                                       | N                                                                     |  |                                                   |
|                                                                     |                                                          |                                                                                          |                                                                                                                                                  | Identify the contract parties                                                        | Conduct a workshop to         | Select the best combination of                                          | Agree and sign                                                        |  |                                                   |



|  |  |                                                                                                                                                                                             |     |   |                                             |                                       |   |  |
|--|--|---------------------------------------------------------------------------------------------------------------------------------------------------------------------------------------------|-----|---|---------------------------------------------|---------------------------------------|---|--|
|  |  |                                                                                                                                                                                             |     |   | identify possible incentive/penalty clauses | sustainable Incentive/penalty clauses |   |  |
|  |  | The availability of sustainable Incentive/penalty clauses in the contract to pursue carbon emission reduction                                                                               | Yes | Y | Y                                           | Y                                     | N |  |
|  |  |                                                                                                                                                                                             |     |   |                                             |                                       |   |  |
|  |  | Capacity study of carbon emission (provide a description of the related process flows and interactions allowing the planning team to ensure adequate facility capacity for carbon emission) | NA  |   |                                             |                                       |   |  |
